# Supplementary material for: Landscape as a Model: The Importance of Geometry
Source: PLOS journal article supplement (doi:10.1371/journal.pcbi.0030200), 2007-10-24
Supplement: S1 (10.1371/journal.pcbi.0030200.s001) [file journal.pcbi.0030200.s001]

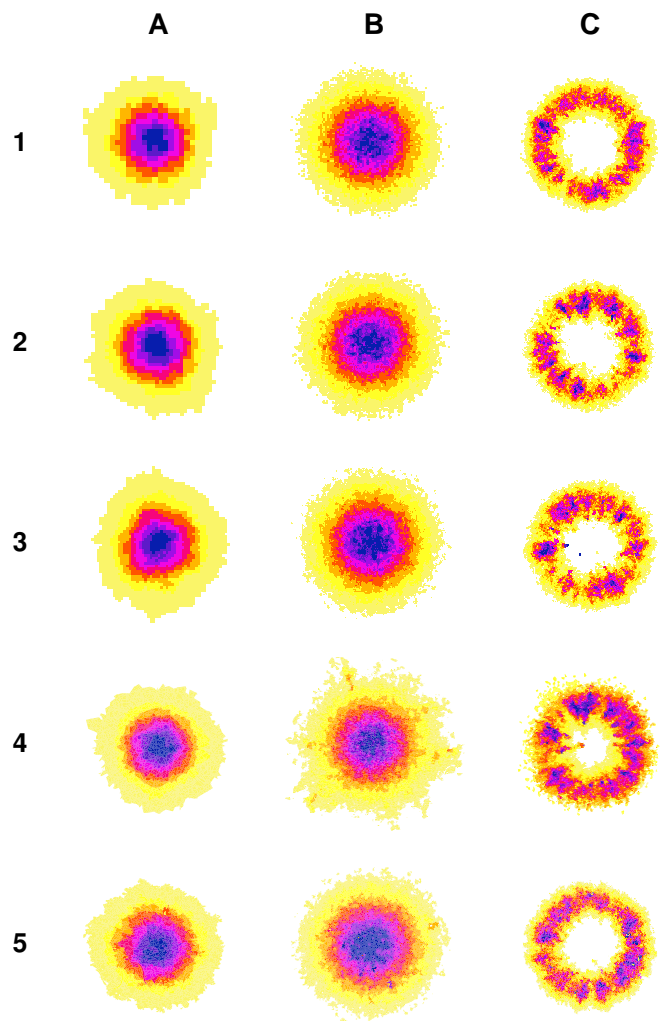

**FIGURE S1 POPULATION DISTRIBUTIONS AFTER RANDOM MOVEMENT IN IRREGULAR VIRTUAL LANDSCAPES**
